# Supplementary material for: IP Law and Policy for the Data Economy in the EU
Source: publisher site journal article supplement (doi:10.1515/econ-2022-0043), 2023-01-01
Supplement: Supplementary file [file Original_submission.pdf]

# Economics

## IP Law and Policy for the Data Economy in the EU

--Manuscript Draft--

|                                     |                                                                                                                                                                                                                                                                                                                                                                                                                                                                                                                                                                                                                                                                                                                                                                                                                                                                                                                                                                                                                                                                                                                                                                                                  |
|-------------------------------------|--------------------------------------------------------------------------------------------------------------------------------------------------------------------------------------------------------------------------------------------------------------------------------------------------------------------------------------------------------------------------------------------------------------------------------------------------------------------------------------------------------------------------------------------------------------------------------------------------------------------------------------------------------------------------------------------------------------------------------------------------------------------------------------------------------------------------------------------------------------------------------------------------------------------------------------------------------------------------------------------------------------------------------------------------------------------------------------------------------------------------------------------------------------------------------------------------|
| <b>Manuscript Number:</b>           | ECONJOURNAL-D-22-00073                                                                                                                                                                                                                                                                                                                                                                                                                                                                                                                                                                                                                                                                                                                                                                                                                                                                                                                                                                                                                                                                                                                                                                           |
| <b>Full Title:</b>                  | IP Law and Policy for the Data Economy in the EU                                                                                                                                                                                                                                                                                                                                                                                                                                                                                                                                                                                                                                                                                                                                                                                                                                                                                                                                                                                                                                                                                                                                                 |
| <b>Article Type:</b>                | Research Article                                                                                                                                                                                                                                                                                                                                                                                                                                                                                                                                                                                                                                                                                                                                                                                                                                                                                                                                                                                                                                                                                                                                                                                 |
| <b>Keywords:</b>                    | intellectual property, data economy, data act, digital industries, regulation, European Union                                                                                                                                                                                                                                                                                                                                                                                                                                                                                                                                                                                                                                                                                                                                                                                                                                                                                                                                                                                                                                                                                                    |
| <b>Manuscript Region of Origin:</b> | GERMANY                                                                                                                                                                                                                                                                                                                                                                                                                                                                                                                                                                                                                                                                                                                                                                                                                                                                                                                                                                                                                                                                                                                                                                                          |
| <b>Abstract:</b>                    | <p>The current policy vision for Europe's digital future centres around facilitating the availability of data by means of data access, sharing and portability rights. In the existing legal framework, such rights are already foreseen in different legal instruments. In actual practice, however, (horizontal) data sharing is governed in the first place by contracts. Currently, well-established business practices and non-mandatory model contract terms are lacking. To reduce transaction costs and chilling effects in the sector, the main task would therefore be to provide a set of non-mandatory default rules or soft-law model contracts. The database maker's sui generis right or trade secrets protection, mainstays of this area, have the potential to aggravate access problems and hamper efficient access and portability regimes. While the Trade Secrets Directive as a very modern and necessarily flexible instrument, on principle, is rather well-equipped for achieving balanced results the Database Directive is in imminent need of reform, in particular as even the Data Act Proposal leaves many issues of the database sui generis right unsolved.</p> |
| <b>Manuscript Classifications:</b>  | 4: Microeconomics; 11: Law and Economics; 12: Industrial Organization                                                                                                                                                                                                                                                                                                                                                                                                                                                                                                                                                                                                                                                                                                                                                                                                                                                                                                                                                                                                                                                                                                                            |

# IP Law and Policy for the Data Economy in the EU

## 1. Acceptance of the access and portability perspective in the European Union

Since 2015, both the legal and the political debate on fostering the development of data markets in the EU has shifted from an incentive-oriented ‘property’ approach to a competition oriented institutional analysis of existing and future problems in data markets. The *access* to and the *portability* of data, the *incentives* for data sharing, and the necessary *infrastructure*, such as interoperability and data quality, have thereby been identified as key issues for establishing a European data economy. Various seminal reports (Crémer, de Montjoye, & Schweitzer, 2019; Furman, Coyle, & others, 2019) and an intense discussion (e.g. Drexl, 2018; Drexl, J. & others, 2017; Kerber, 2016; Leistner, 2017 and 2021a; Leistner, Antoine, & Sagstetter, 2021; Schweitzer & Welker, 2021) in academia, policy and practice laid the foundation for the Commission’s sweeping project to develop a regulatory framework for Europe’s digital and data-driven future.

As a result, the Data Strategy (European Commission, 2020) of early 2020 defined the objectives of facilitating availability of data by means of data access and sharing (G2B, B2G, B2C, and B2B), establishing a data governance structure, reducing technical barriers and tackling market imbalances. In winter 2020, the ‘Digital Services Package’ (see further Eifert & others, 2021; Leistner, 2021b), consisting of the Data Governance Act, the Digital Markets Act, and the Digital Services Act, was presented as a first step for pursuing these goals. These proposals are currently in the legislative process, albeit with different pace.

With the proposal for a Data Act in February 2022, the Commission has presented a further cornerstone of its strategy for a data-driven economy. After giving an overview of the existing framework and current challenges with regard to data (2.), we will also take a brief (comprehensively, Leistner & Antoine, 2022) look at the new approaches in the Data Act Proposal (3.).

## 2. Existing regulatory framework

From an IP perspective, the question arises which role is played by the various IP instruments for protecting data collections, such as particularly the *database sui generis right* and the protection of *trade secrets*. Obviously, these existing protection instruments can come into conflict with or at least have an impact on existing and future access, portability and sharing liberties or rights. In that sense, they constitute an institutional infrastructure. But is that infrastructure balanced, proportionate and effective? Does it interfere with the general objective to facilitate access to and availability of data? And how can the different objectives be balanced against each other? To answer these questions and to briefly evaluate the Data Act Proposal in light of ‘our’ answers, we will first give a brief overview of the instruments of protection

potentially applying to data collections (2.1), before we address the current legal framework on data access, sharing and portability and its relation to IP and trade secrets – covering the status quo as well as possible ways ahead (2.2).

## **2.1 Protection of data collections by IP rights and as trade secret**

Data collections can in particular be protected under the database maker's *sui generis* right according to Art. 7 of the Database Directive or as trade secret under the conditions of the Trade Secrets Directive.

The *database sui generis right* aims at protecting the database makers investment in a database by means of an exclusive right. Pursuant to Art. 7 (1) Database Directive, any substantial investment in either obtaining, verification or presentation of the contents of a database gives rise to the database maker's right to prevent extraction and/or re-utilisation of the whole or of a substantial part of the contents of that database. As the European Court of Justice (ECJ) interprets the definition of 'database' very extensively (*Freistaat Bayern v Verlag Esterbauer* [2015], C-490/14, paras 18 et seq.), the vast majority of datasets aggregated in a data-driven economy in principle qualify for a protection as database (Leistner, 2017, pp. 27 et seq.; Leistner, 2021a, pp. 226 et seq.; also Drexl, 2018, pp. 67 et seq.). Furthermore, the substantive threshold of database *sui generis* protection, i.e. the requirement of a '*substantial investment*', is rather low (Leistner, 2017, p. 30).

The decisive criterion for possible protection under the *sui generis* right has, therefore, become whether the investment concerned the *collection* or mere *creation* of a database's content. This distinction has been introduced by the ECJ in order to prevent protection by the exclusive right in sole source-situations in which data is solely available from one particular source and cannot be obtained with comparable investments by another competitor or market participant otherwise (*British Horseracing Board v Hill* [2004], C-203/02, paras. 30 et seq.; *Fixtures Marketing v Oy Veikkaus* [2004], C-46/02; *Fixtures Marketing v Svenska Spel* [2004], C-338/02; *Fixtures Marketing v Organismos prognostikon* [2004], C-444/02). Parts of literature have interpreted the ECJ's argumentation (that investments in the *creation* of data, which is, for instance, collected as a mere by-product of another main activity (spin off-situations), cannot qualify for *sui generis* protection) in a strict way, as to generally exclude machine-generated data from the scope of Art. 7 Database Directive. But, as we have pointed out elsewhere, this is by no means sure: First, the ECJ's interpretation was in principle tailored to sole-source situations, and, secondly, numerous national courts have already recognised certain investments in necessary technical infrastructure for measuring, obtaining or documenting existing data as sufficient for a protection under the *sui generis* right (German Federal Supreme Court (BGH), *HIT Bilanz* [2005], I ZR 290/02 and *Autobahnmaut* [2010], I ZR 47/08; Austrian Federal Supreme Court (OGH) [2015], 4 Ob 206/14). If this line of case law were further followed or even generalised by the ECJ in the future, most IoT data (and many other) would

certainly qualify for protection, if based on substantial investments into the installation of sensors and similar measuring infrastructure (being regarded as investments into the collection of [physically] existing data in nature or of technical processes). Thus, this problem needed to be addressed (Leistner, 2017, pp. 27 et seq.). And indeed, in order to resolve the current legal uncertainty regarding the *sui generis* right's conditions of protection, the Proposal for a Data Act contains an explicit provision to clarify the *sui generis* right's scope with respect to machine-generated data in Art. 35, which, albeit, follows a very sector-specific and limited approach to the problem (Derclaye & Husovec, 2022; see also below 4.).

In particular because of the lacking exception for databases of public bodies (in general copyright law, such exception exists in most Member States), the *sui generis* right also has a significant and problematic impact on G2B data sharing (access to public sector information). Even though the Open Data Directive and the Data Governance Act contain provisions, according to which the *sui generis* right should not be invoked by public bodies against access requests (Art. 1 (6) Open Data Directive; Art. 5 (7) Data Governance Act), problems have emerged in some Member States and it is, therefore, necessary and has been recommended to add a respective exception to the Database Directive (Bently, Derclaye, & others, 2018, p. 121; Leistner, 2017, p. 47; Leistner, 2021a, p. 229).

Contrary to the *sui generis* right, the protection of *database works* under copyright law will solely play a marginal role. However, as the circumstances of the IMS Health decision (ECJ, *IMS Health v NDC* [2004], C-418/01) show exemplarily, cases in which the structure of a database expresses 'free and creative choices' (ECJ, *Football Dataco v Yahoo* [2012], C- 604/10, para. 38) may exist, leading thus to copyright protection. The same holds true for *patent law* which does not protect data collections as such, but could in principle apply with regard to data encryption or compression processes (Leistner, 2021a, pp. 215 et seq.).

Besides the database *sui generis* right – and in practice of even larger importance –, *trade secrets protection* can extend in principle to all data collections (Aplin, 2017). The protection of trade secrets is based on the consideration that incomplete information constitutes an indispensable prerequisite for functioning competition, so that in particular market-related information has to be protected against unlawful acquisition, disclosure and use. In addition, trade secrets protection – even though not being an exclusive right – aims at reducing transaction costs for factual protection measures and at facilitating access to information by means of licencing contracts. Pursuant to Art. 2 (1) of the Trade Secrets Directive, information can be protected as trade secret if it is not generally known, has commercial value due to its secrecy, and is subject to reasonable steps to keep it secret. Due to this broad definition, diverse types of datasets but also algorithms and program codes needed for the processing of data are eligible for trade secrets protection if the requirements of Art. 2 (1) Trade Secrets Directive are fulfilled (Leistner, 2021a, pp. 219 et seq.).

Because of their far-reaching applicability in data-driven business scenarios, both the database sui generis right and trade secrets protection have the potential to create hold-up situations and to aggravate access problems in certain situations. Therefore, a precise identification of justified access requirements and the resulting actual or potential problem zones at the interface to IP protection is necessary, and, in regard to such concretely identified actual or potential problem zones, an equitable balance between existing and future data access, use and sharing liberties or rights on the one hand, and the existing protection instruments on the rightholders' side on the other hand, has to be found.

## **2.2 Access, use and portability of data**

### *2.2.1 The status quo*

Under the existing *acquis*, data access, portability and sharing are primarily governed by contract law, general competition law, certain very limited sector specific instruments, and – in relation to personal data – by the General Data Protection Regulation (GDPR).

*Art. 20 GDPR* has introduced a claim to portability of personal data as an individual right of the data subject. This entails the right to request the porting of volunteered and observed personal data from one controller to another. Even though *Art. 20 GDPR* also expresses the GDPR's objective to safeguard the fundamental right to protection of personal data (*Art. 8 (1) Charter of Fundamental Rights of the European Union*; *Art. 16 (1) TFEU*), the implementation of the portability right was driven by the objective to reduce lock-in effects and thus reflects a robust pro-competitive approach (Metzger, 2021, p. 295). As a result, *Art. 20 GDPR* became centre of a lively debate about whether portability rights should be applied broadly in order to foster the development of data markets. Currently, however, *Art. 20 GDPR* is not very effective in practice. This is partly due to certain shortcomings of the provision, namely its limited scope (not covering real-time access and inferred data). Most importantly, the practical difficulties resulting from a lack of interoperability prevent an effective implementation of the portability right. Business models, which would be based on this right, such as porting services, do exist in certain fields (e.g. *Soundiiz*, *Freemymusic* or *Songshift* offer porting services with regard to music streaming platforms) but are still scarce. As regards potential conflicts with IP rights or trade secrets of the controller or third parties, *Art. 20 (4) GDPR* provides for a 'balancing of interest' clause which leaves sufficient room for a flexible and equitable interpretation.

Besides certain sector-specific regulation (further Graef, Husovec, & van den Boom, 2020), access to data in B2B relations can primarily be granted under the rather strict conditions of *general competition law*. Pursuant to the requirements established for IP rights in the ECJ's Magill judgment (*RTE and ITP v Commission* [1995], C-241/91 P and C-242/91 P) and since then consolidated and cautiously broadened in *IMS Health* (*IMS Health v NDC* [2004]) and *Microsoft* (Court of First Instance, *Microsoft v Commission* [2007], T-201/04), a claim to a compulsory licence can be based on *Art. 102 TFEU* where a data holder with dominant market

position (in an actual or even a hypothetical upstream licencing market) refuses, without objective reason, access to data which is indispensable to compete in a downstream market with the effect that any competition on that market is eliminated, thereby preventing the emergence of a new product or service<sup>1</sup> (Microsoft v Commission [2007], paras 643 et seq.) for which there is a potential consumer demand (ECJ, Bronner v Mediaprint [1998], C-7/97, para. 40; IMS Health v NDC [2004], paras 38, 48 et seq.). In short, Art. 102 TFEU, on the one hand, solely applies to market dominant firms controlling indispensable data and has, therefore, no effect below this threshold which significantly limits the impact of that provision. On the other hand, compulsory licences under that provision entail, first, even access to information protected as trade secret (Microsoft v Commission [2007], para. 289) and, second, not only access but also the use of the information protected by IP rights or as trade secret by a competitor of the data holder and, thus, can promote innovation even if this leads to innovative products or services in competition<sup>2</sup> with the products or services of the data holder.

The *Digital Markets Act* will implement further access and portability rights. The DMA, however, only applies in relation to so-called *gatekeepers*. Gatekeepers are very narrowly defined in the Regulation. Practically, the DMA will only apply to the GAFAM-companies plus presumably a handful of companies of comparable size and impact. Art. 6 (9) contains the right for business users and end users to port data provided or generated in the context of their use, thus volunteered and observed data, including continuous and real-time access. In addition, Art. 6 (10) foresees a right to data access for business platform users free of charge, with effective, high-quality, continuous and real-time access, including inferred data from such use in aggregated or non-aggregated form. Whereas, these two provisions enable users to access and port *individual-level use data*, Art. 6 (11) introduces a sector-specific access right for search engine providers to ranking, query, click and view data – thus, aggregated data – of the gatekeeper under FRAND terms. Notably, Art. 6 (11) allows for access to aggregated data even for search engine providers which directly compete with the gatekeeper (and data holder).

In European *contract law*, access to individual level data in B2C relations is provided solely by the Digital Contents Directive ((EU) 2019/770) which provides for a post-contractual portability right for non-personal data in Art. 16 (4). With respect to B2B relations, a right to access and portability of individual level use data does so far not exist in European contract law. However, the *Platform to Business Regulation* ((EU) 2019/1150) stipulated certain transparency obligations for platform providers in relation to business users concerning contractual and technical access to volunteered and observed data of the user.

---

<sup>1</sup> This requirement has in fact been watered down to a requirement of prevention of the emergence of a better or more efficient product in the Microsoft judgment.

<sup>2</sup> This is because in IMS Health the ECJ accepted a dominant position (of the IP holder) in a mere hypothetical upstream market as sufficient basis for a compulsory license although the license seeker needed the essential IP protected information because it was objectively necessary to compete with the services of the IP holder in the downstream services market.

Horizontal data access and sharing is primarily based on contractual agreements. Whereas so far neither well-established business practices nor model contract terms exist, in the recent years several soft law instruments have been developed in order to provide guidance (European Commission, 2018; American Law Institute & European Law Institute, 2021). Nonetheless, contracting ‘on data’ is still characterised by significant information and transaction costs as well as legal uncertainty in the EU market.

### 2.2.2 *The way forward*

Meanwhile, certain case groups can be distilled from the academic and policy discussion in which actual or potential market failure seems conceivable and access, sharing and use rights might therefore be justifiable. The first case group refers to access, use and portability of individual-level data that is collected by a producer or service provider. The second case group concerns access of competitors to complete, aggregated datasets, where this is necessary in order to establish workable competition in aftermarket or complementary markets. The third case group relates to access to large aggregated datasets held by big data conglomerates necessary for the development of innovative unrelated products or services, e.g. in the context of AI (Crémer, de Montjoye & Schweitzer, 2019, pp. 75 et seq.).

As described above, the currently existing statutory EU framework of access, use and portability rights does particularly address the first case group, hence, *access to individual-level use data* which has been provided by a data subject/user or observed by a provider – such access rights mainly address *switching cost problems (lock in) or access to data in order to provide individual aftermarket services*. Existing mechanisms in EU law are Art. 20 GDPR (personal data), Art. 16 (4) Digital Contents Directive (on B2C post-contractual level) as well as Arts. 6 (9) and (10) of the Digital Markets Act (in relation to gatekeepers).

General EU competition law can under certain conditions reach further: it cannot only mandate access to (and use of) individual-level data, but also under certain conditions grant access for competitors to aggregated datasets where this is objectively indispensable for innovation in a downstream market, which can even be the market, where the data holder offers products or services, since any downstream market in relation to the upstream market for data licences will suffice even if the latter is a hypothetical market (Crémer, de Montjoye, & Schweitzer, 2019, pp. 102 et seq.; Schweitzer & Welker, 2021, pp. 141 et seq). However, Art. 102 TFEU applies only in relation to *market dominant firms* (and as far as the further requirements for a compulsory licence are fulfilled). Thus, essentially, Art. 6 (11) of the Digital Markets Act is the only current provision in the European data *acquis* covering access to (certain) aggregated datasets which extends even to directly competing search engine providers.

In sum: Current EU law is characterised by a differentiated IP protection situation which is balanced as regards the ‘classic’ IP rights as well as trade secrets protection, but which reveals certain problematic uncertainties and tendencies to over-protection as regards the database

maker's sui generis right laid down in the Database Directive of 1996. As for access rights, certain sector specific access rights in regard to individual level data help reduce switching costs and do allow for certain specific aftermarket services. By contrast, broader access rights to foster data markets and in particular sharing and use of data in order to develop innovative products or services are not yet broadly foreseen. In regard to this latter objective, the Digital Markets Act will introduce some limited data access rights in relation to so-called *gatekeepers*. Besides, compulsory licences can be based on Art. 102 TFEU (i.e. general competition law), albeit only in relation to dominant firms and under certain additional conditions.

### 3. New Directions: The envisaged Data Act

Against this background, the most recent Proposal for a Data Act, which was published on February 23, 2022, with its main focus on access to, sharing and use of IoT data, leaves mixed impressions. The Data Act Proposal was widely expected to implement a far-reaching, horizontal framework for data sharing in general.

However, the Proposal for a Data Act (in its part on data access, sharing, and use) essentially addresses but one particular constellation: Access, sharing and use of individual-level data that is 'co-generated' by the use of connected (IoT) products and related services. According to Art. 4 (1) of the Proposal, any *user*, being a natural or legal person, has the right to access and use data generated by its use of a product or related service, including in principle continuous and real-time access vis-à-vis the data holder. In addition, Art. 5 of the Data Act provides the user's right to 'authorise' *sharing* of the data generated by a product or related service *with a third party*. Both Art. 4 and Art. 5 only cover volunteered and observed data. However, they do not apply to inferred data – thus excluding the most valuable data category for most actual innovative uses in the context of new business models (Kerber, 2022, p. 12; Leistner & Antoine, 2022, p. 84). With the foreseen mandatory rights (see Art. 12 (2)), the Data Act intends to propose a 'cooperative market-model' for co-generated data in the IoT sector, allotting a central role to the users of data-collecting products and related services (Leistner & Antoine, 2022, pp. 16 et seq., 77 et seq.). This model shall apply to the entire IoT 'sector', thus, to B2C and B2B relations alike. Only small and micro enterprises as data holders are exempted from the obligation to make data available respectively.

The Data Act follows the objective to open certain secondary markets (aftermarkets for IoT-related services, such as maintenance and repair, insurances etc.) by facilitating access, use and sharing of co-generated IoT data. Insofar, the user's access right set forth in Art. 4 might be a consequent instrument to facilitate the user's access to individual-level data (first case group). In addition, the right for sharing data with third parties pursuant to Art. 5 to a certain limited extent indirectly covers the second case group of data access necessary for establishing workable competition in aftermarkets. In that regard, the Data Act cautiously limits the possible function of the sharing and use rights: the shared data must not be used to develop products or



services which are in competition with the data holders' products (further Leistner & Antoine, 2022, pp. 88 et seq.).

Even with these limitations in mind, the *sweeping scope and generalising character of the proposed Data Act*, which shall cover the entire IoT sector with a mandatory law based regulation and might thus risk to level necessary differentiations in particular sectors, seems at least remarkable and will have to be reconsidered in the future legislative discussion.

Further, it seems equally surprising, that this new mandatory law framework shall apply to *B2C and B2B relations alike* (Kerber, 2022, p. 25; Leistner & Antoine, 2022, pp. 16 et seq., 80 et seq.). In fact, in regard to B2B relations, even if this was meant to be a 'sandbox' market design approach (albeit in this case with a rather over-sized 'sandbox'), such market design approach might arguably better be followed by way of a non-mandatory framework of default rules. By contrast, mandatory law risks to prevent certain efficient data contracts in this sector, where e.g. newcomers to the IoT market can only offer their products and related services on condition of an individually negotiated limited exclusivity of use period concerning the generated data.

While these two aspects seem to indicate that the current scope and general character of the proposed Data Act follows too broad an approach, at the same time, paradoxically, the access, sharing and use rights proposed in the Data Act are at the same time inherently *limited* in a way which puts the future effectivity of this legal framework into certain doubt (Kerber, 2022, p. 2; Leistner & Antoine, 2022, pp. 77 et seq.). This concerns, first, the limitation to *volunteered and captured data* as such and the resulting exclusion of any inferred data, such as particularly valuable standardised or contextualised datasets. Secondly, the exclusion of any re-use of the data to develop products or services *which are in competition with the data holder's products* essentially limits the impact of the act to the mere use scenario of certain aftermarket services for IoT products – in result, the broader case group of access to larger data sets in the interest of certain *innovative* uses and business models remains entirely unaddressed (Leistner & Antoine, 2022, pp. 88 et seq.). Thirdly, in order to unlock the full potential of the proposed 'sector-specific' market-model, the role of the data holder for upstream data sharing should equally be taken into view instead of almost exclusively focusing on the users' position (Leistner & Antoine, 2022, pp. 92 et seq.). Allocating the right to share and re-use data to the downstream *users alone* seems inefficient as often the upstream data holders will be in a better position to initiate data sharing and to deliver essential data to innovative businesses seeking such necessary data.

In light of these points of critique, it remains to be seen how the proposed cooperative model for data generated by IoT products will develop in the legislative discussion. At the moment, the main task for academics is to provide input to this ongoing legislative process in order to improve the current conception and text (e.g. contributions of Drexler & others (2022); Efroni & others, 2022; Graef & Husovec, 2022; Kerber, 2022; Leistner & Antoine, 2022).

#### 4. Conclusions

The current policy vision for Europe's digital future centres around the objective to facilitate the availability of data by means of data access, sharing and portability rights. In the existing legal framework, such rights are already foreseen in different legal instruments covering in particular access to and portability of individual-use level data. Beyond that, primarily general competition law can provide for B2B access in relation to market dominant data holders under the conditions of Art. 102 TFEU. European contract law, hitherto, does not contain a general access or portability right beyond certain B2C instruments. In actual practice, however, (horizontal) data sharing is governed in the first place by contracts. Currently, well-established business practices and non-mandatory model contract terms are lacking. Only some soft law instruments (best practices) give guidance, albeit on a rather high level without providing for detailed (default) contractual clauses. To reduce transaction costs and chilling effects in the sector and thus to increase businesses willingness to engage in data sharing and use, the main task would therefore be to provide a set of non-mandatory default rules or soft-law model contracts.

As data collections can in principle be subject to the database maker's sui generis right or trade secrets protection, these rights have the potential to aggravate access problems and hamper efficient access and portability regimes. While the Trade Secrets Directive as a very modern and necessarily flexible instrument, on principle, is rather well-equipped for achieving balanced results the Database Directive is in need of reform. In the Data Act Proposal, Art. 35 addresses this latter issue only in a very targeted, sector-specific way by clarifying that machine-generated data shall fall outside the scope of protection. While this particular problem of the sui generis right can be 'resolved' by such a provision (if certain necessary technical improvements are made, Derclaye & Husovec, 2022; Leistner & Antoine, pp. 119 et seq.), many other issues of the database sui generis right remain unsolved.

As for the perspectives of the future 'access rights' landscape in the EU, the current policy approaches leave a mixed impression. In the services sector, any new access rights and other competition-oriented instruments (as foreseen in the Digital Markets Act) are currently mainly targeted towards so-called gatekeepers, i.e. the GAFAM companies plus a handful of other platform businesses of comparable size and impact in the EU market. In the IoT sector, the recently proposed Data Act, by contrast, follows a horizontal approach covering B2C and B2B relations alike. Certain shortcomings of this newly proposed instrument have been listed in 3. above; this shall not be repeated here. However, another more general remark seems necessary: even if the mentioned shortcomings in the proposed Data Act were remedied in the future legislative process, it seems fundamentally problematic that this instrument only addresses IoT products and related services, while the *services sector in general* shall only be regulated by

the DMA. This results in a certain imbalance: while the DMA essentially only addresses Big Tech, the proposed Data Act will in principle cover any IoT producer (with only some exemptions for micro and small-sized enterprises). From our viewpoint, this makes the current EU policy for the data society askew as it leaves a legal vacuum for data related services underneath the thresholds of gatekeepers (in the DMA) or market dominance (in general EU competition law). If the proposed Data Act shall indeed complete the jigsaw puzzle of the EU's regulatory approach to the data economy this sector will have to be addressed as well.

## References

American Law Institute and European Law Institute (2021). *ALI-ELI Principles for a Data Economy – Data Transactions and Data Rights*. ELI Final Council Draft. Available at [https://www.principlesforadataeconomy.org/fileadmin/user\\_upload/p\\_principlesforadataeconomy/Files/Principles\\_for\\_a\\_Data\\_Economy\\_ELI\\_Final\\_Council\\_Draft.pdf](https://www.principlesforadataeconomy.org/fileadmin/user_upload/p_principlesforadataeconomy/Files/Principles_for_a_Data_Economy_ELI_Final_Council_Draft.pdf).

Aplin, T. (2017) Trading Data in the Digital Economy: Trade Secrets Perspective. In Lohsse, S., Schulze, R., and Staudenmayer, D. (Eds.), *Trading Data in the Digital Economy: Legal Concepts and Tools* (pp. 59–72). Baden-Baden, Germany: Nomos.

Bently, L., Derclaye, E. and others (2018). *Study in support of the evaluation of Directive 96/9/EC on the legal protection of databases – Final Report*. Available at <https://op.europa.eu/de/publication-detail/-/publication/5e9c7a51-597c-11e8-ab41-01aa75ed71a1>.

Crémer, J., de Montjoye, Y. and Schweitzer, H. (2019). *Competition Policy for the digital era – Final report*. Available at <https://ec.europa.eu/competition/publications/reports/kd0419345enn.pdf>.

Derclaye, E. and Husovec, M. (2022). *Why the sui generis database clause in the Data Act is counter-productive and how to improve it?* Available at [https://papers.ssrn.com/sol3/papers.cfm?abstract\\_id=4052390](https://papers.ssrn.com/sol3/papers.cfm?abstract_id=4052390).

Drexl, J. and others (2017). *Position Statement of the Max Planck Institute for Innovation and Competition of 26 April 2017 on the European Commission's 'Public consultation on Building the European Data Economy'*. Max Planck Institute for Innovation and Competition Research Paper No 17–08. Available at <https://www.ip.mpg.de/en/research/research-news/position-statement-public-consultation-on-building-the-european-data-economy.html>.

Drexl, J. (2018). *Data Access and Control in the Era of Connected Devices – Study on Behalf of the European Consumer Organisation BEUC*. Available at [https://www.beuc.eu/sites/default/files/publications/beuc-x-2018-121\\_data\\_access\\_and\\_control\\_in\\_the\\_area\\_of\\_connected\\_devices.pdf](https://www.beuc.eu/sites/default/files/publications/beuc-x-2018-121_data_access_and_control_in_the_area_of_connected_devices.pdf).

Drexl, J. and others (2022). *Max Planck Institute for Innovation and Competition Position Statement of 25 May 2022 on the Commission's Proposal of 23 February 2022 for a Regulation on harmonised rules on fair access to and use of data (Data Act)*. Available at [https://www.ip.mpg.de/fileadmin/ipmpg/content/stellungnahmen/Position\\_Statement\\_MPI\\_Data\\_Act\\_Formal\\_\\_13.06.2022.pdf](https://www.ip.mpg.de/fileadmin/ipmpg/content/stellungnahmen/Position_Statement_MPI_Data_Act_Formal__13.06.2022.pdf).

Eifert, M. and others (2021). Taming The Giants: The DMA/DSA Package. *Common Market Law Review* 58, 987–1028.

Efroni, Z. and others (2022). *Weizenbaum Institute for the Networked Society, Position Paper regarding Data Act*. Available at <https://www.ssoar.info/ssoar/handle/document/79542>.

European Commission (2018). *Towards a common European data space*. COM(2018) 232 final. Accompanied by the more detailed Staff Working Document (2018). *Guidance on sharing private sector data in the European data economy*. SWD/2018/125 final.

European Commission (2020). *A European strategy for data*. COM(2020) 66 final.

Furman, J., Coyle, D. and others (2019). *Unlocking Digital Competition – Report of the Digital Competition Expert Panel*. UK Government. Available at [https://assets.publishing.service.gov.uk/government/uploads/system/uploads/attachment\\_data/file/785547/unlocking\\_digital\\_competition\\_furman\\_review\\_web.pdf](https://assets.publishing.service.gov.uk/government/uploads/system/uploads/attachment_data/file/785547/unlocking_digital_competition_furman_review_web.pdf).

Graef, I. and Husovec, M. (2022). Seven Things to Improve in the Data Act. Available at [https://papers.ssrn.com/sol3/papers.cfm?abstract\\_id=4051793](https://papers.ssrn.com/sol3/papers.cfm?abstract_id=4051793).

Graef, I., Husovec, M. and van den Boom, J. (2020). Spill-Overs in Data Governance: Uncovering the Uneasy Relationship Between the GDPR's Right to Data Portability and EU Sector-Specific Data Access Regimes. *Journal of European Consumer and Market Law*, 3–16.

Kerber, W. (2016). Governance of Data: Exclusive Property vs. Access. *International Journal of Intellectual Property and Competition Law*, 759–762.

Kerber, W. (2022). *Governance of IoT Data: Why the EU Data Act will not fulfill its objectives*. Available at [https://papers.ssrn.com/sol3/papers.cfm?abstract\\_id=4080436](https://papers.ssrn.com/sol3/papers.cfm?abstract_id=4080436).

Leistner, M. (2017). Big Data and the EU Database Directive 96/9/EC: Current Law and Potential for Reform. In Lohsse, S., Schulze, R., and Staudenmayer, D. (Eds.), *Trading Data in the Digital Economy: Legal Concepts and Tools* (pp. 27–57). Baden-Baden, Germany: Nomos. Available at [https://papers.ssrn.com/sol3/papers.cfm?abstract\\_id=3245937](https://papers.ssrn.com/sol3/papers.cfm?abstract_id=3245937).

Leistner, M. (2021a). The existing European IP rights system and the data economy. In German Federal Ministry of Justice and Consumer Protection and Max Planck Institute for Innovation and Competition (Eds.), *Data access, consumer interests and public welfare* (pp. 209–251). Baden-Baden, Germany: Nomos. Available at [https://papers.ssrn.com/sol3/papers.cfm?abstract\\_id=3625712](https://papers.ssrn.com/sol3/papers.cfm?abstract_id=3625712).

Leistner, M. (2021b). Towards an Access Paradigm in Innovation Law? *Gewerblicher Rechtsschutz und Urheberrecht Internationaler Teil*, 925–931.

Leistner, M. and Antoine, L. (2022). *IPR and the use of open data and data sharing initiatives by public and private actors*. Study requested by the European Parliament's Committee on Legal Affairs. Available at <https://ssrn.com/abstract=4125503>.

Leistner, M., Antoine, L. and Sagstetter, T. (2021). *Big Data*. Tübingen, Germany: Mohr Siebeck.

Metzger, A. (2021). Access to and porting of data under contract law: Consumer protection rules and market-based principles. In German Federal Ministry of Justice and Consumer Protection and Max Planck Institute for Innovation and Competition (Eds.), *Data access, consumer interests and public welfare* (pp. 287–317). Baden-Baden, Germany: Nomos.

Schweitzer, H. and Welker, R. (2021). A legal framework for access to data – A competition policy perspective. In German Federal Ministry of Justice and Consumer Protection and Max Planck Institute for Innovation and Competition (Eds.), *Data access, consumer interests and public welfare* (pp. 103–153). Baden-Baden, Germany: Nomos.
